# Supplementary material for: Developing a threat risk register based on the IUCN threat hierarchy for five tropical Important Plant Areas in Guinea
Source: PeerJ. 2025 Jul 14;13:e19629. doi: 10.7717/peerj.19629 (PMC12269778; doi:10.7717/peerj.19629)
Supplement: Supplemental Information 1 [file peerj-13-19629-s001.xlsx]

## Sheet:  Bero
IUCN Threats to CEPF Project Risk Register			Last Review Date: June 2022				Threat level and description of activities						Weak	AVERAGE	Pupil	Very High
Protected Area: CLASSIFIED BERO FOREST													1-3	4-6	7-9	10-12
Threat Class	Under Classification_1	Under Classification_2	Area/Location	Date recorded	Contact details	Habitat	Description of activities	Risk scores (4 = very high), 1 = low)	Calendar (Past = 2, Current = 3, Future = 1)	Overall impact level	Mitigation measures
1. Residential & Commercial													Total Score Overall Impact Level
	Habitat & Urban Areas									0
	Habitat & Urban Areas									0
	Commercial and industrial areas									0
	Tourism & Recreational Spaces									0
2. Agriculture & Aquaculture
	Agriculture & Perennial Non-Timber crops	Agro-industrial agriculture	Kabiéta	02/06/2022	8.1744804, -8.7098884	Palm groves	A palm grove plantation in the classified forest of Mont Béro.	3	2	6	Compensate the planters for abandoning the classified forest.
		Agro-industrial agriculture	Kabiéta	02/06/2022	8.175726, -8.7083131	Agroforestry systems (association of perennial crops and forest species)	An old, unmaintained coffee and petit cola plantation in the classified forest of Mont Béro.	2	2	4	Prohibit the maintenance of plantations in the classified forest.
		Agro-industrial agriculture	Laminata	01/06/2022	8.2145742, -8.6724898	Clear forests	A new coffee and banana plantation inside the classified forest of Mont Béro.	3	3	9	Prohibit maintenance and re-upholstery.
		Agro-industrial agriculture	Laminata	05/30/2022	8.1863529, -8.6969081	Clear forests	A former coffee plantation inside the classified forest of Mont Béro.	4	2	8	Ban the maintainance so they give up.
		Agro-industrial agriculture	Laminata	05/31/2022	8.1927427, -8.6603276	Degraded, secondary and transitional forests	A coffee plantation maintained in the classified forest of Mont Béro.	4	2	8	Ban the maintenance of plantations.
		Agro-industrial agriculture	Laminata	05/30/2022	8.1878266, -8.695524	Gallery forests	A former coffee, cocoa and kola plantation in the classified forest of Mont Béro.	3	2	6	Compensate the planters and prohibit them from logging in the classified forest.
		Agro-industrial agriculture	Laminata	05/31/2022	8.1896767, -8.6624539	Gallery forests	An old cocoa plantation inside the classified forest of Mont Béro on the banks of the Oulé river towards the source.	3	2	6	Compensate local residents for abandoning the classified forest.
		Agro-industrial agriculture	Laminata	05/31/2022	8.2037592, -8.6509485	Dense forests	An unmaintained coffee and banana plantation in the classified forest of Mont Béro.	3	2	6	Prohibit the maintenance of plantations in the classified forest.
		Agro-industrial agriculture	Mangana	03/06/2022	8.2653353, -8.708582	Degraded, secondary and transitional forests	A former coffee and banana plantation inside the classified forest of Mont Béro.	4	2	8	Compensate the planters to free up the classified forest.
		Agro-industrial agriculture	Mangana	03/06/2022	8.2624213, -8.713777	Degraded, secondary and transitional forests	A former coffee plantation in the classified forest of Mont Béro.	3	2	6	Compensate the planters and prohibit maintenance to abandon the classified forest.
		Agro-industrial agriculture	Mangana	03/06/2022	8.2684924, -8.7041324	Clear forests	An old, unmaintained banana and coffee plantation in the classified forest of Mont Béro.	3	2	6	Proposed solution: ban the maintenance of plantations.
		Agro-industrial agriculture	Mangana	03/06/2022	8.2712503, -8.7002892	Gallery forests	An unmaintained coffee plantation in the classified forest of Mont Béro.	3	2	6	Prohibit the maintenance of plantations and replanting.
		Agro-industrial agriculture	Mangana	04/06/2022	8.2662282, -8.7054877	Degraded, secondary and transitional forests	An old, unmaintained coffee plantation in the classified forest of Mont Béro.	3	2	6	Prohibits the maintenance of the plantation.
		Agro-industrial agriculture	Mangana	04/06/2022	8.2599818, -8.682337	Clear forests	A new, untended coffee plantation inside the classified forest of Mont Béro.	3	2	6	New plantations are prohibited in the classified forest, but if the old plantations are removed, it's over.
		Agro-industrial agriculture	Ouléouon	05/29/2022	8.1282486, -8.6825341	Secondary forest	An old, unmaintained coffee plantation inside the classified forest of Mont Béro.	3	2	6	Ban maintenance and compensate them for abandoning the classified forest.
		Agro-industrial agriculture	Ouléouon	05/29/2022	8.1232238, -8.672913	Rainfed crops and fallow land	An old plantation maintained in the classified forest of Mont Béro.	3	2	6	Prohibit maintenance and re-upholstery.
		Agro-industrial agriculture	Ouléouon	05/29/2022	8.1276617, -8.6776333	Secondary forest	An old, unmaintained coffee plantation in the classified forest of Mont Béro.	3	2	6	To make them flee into the classified forest.
		Agro-industrial agriculture	Saadou	05/26/2022	8.1946983, -8.7486067	Agroforestry systems (association of perennial crops and forest species)	former cocoa, coffee and banana plantation inside the classified forest of Mont Béro.	4	2	8	We are asking for the support of partners and the State to compensate them for leaving the classified forest completely.
		Agro-industrial agriculture	Saadou	05/27/2022	8.2084619, -8.7186775	Clear forests	An old, unmaintained coffee plantation in the classified forest.	4	2	8	Get everyone out into the classified forest.
		Agro-industrial agriculture	Saadou	05/27/2022	8.2095196, -8.7238332	Clear forests	An old, unmaintained coffee plantation in the classified forest.	4	2	8	Compensate local residents for abandoning plantations in the classified forest.
		Agro-industrial agriculture	Saadou	05/28/2022	8.1798202, -8.7403417	Dense forests	An old, unmaintained coffee plantation inside the classified forest of Mont Béro.	4	2	8	Ban the maintenance and get rid of them.
		Agro-industrial agriculture	Saadou	05/26/2022	8.1961564, -8.7437825	Clear forests	An old, unmaintained coffee plantation in the classified forest.	3	2	6	We are asking for your intervention to find a solution to the problems of plantations in our classified forests.
		Agro-industrial agriculture	Saadou	05/26/2022	8.1918315, -8.7437877	Dense forests	A cocoa plantation maintained inside the classified forest of Mont Béro.	3	2	6	This is to compensate them so that they can abandon this plantation in the classified forest.
		Agro-industrial agriculture	Saadou	05/27/2022	8.2028764, -8.7133407	Clear forests	A coffee plantation inside the classified forest.	2	3	6	Compensate the local population.
		Agro-industrial agriculture	Saadou	05/27/2022	8.2032815, -8.7103176	Clear forests	A cocoa and coffee plantation in the classified forest of Mont Béro.	3	2	6	Find projects for the population to leave the classified forest.
		Agro-industrial agriculture	Saadou	05/27/2022	8.2063756, -8.709798	Rainfed crops and fallow land	New banana and taro plantation after the bushfires in the classified forest.	2	3	6	Make the population leave the classified forest.
		Agro-industrial agriculture	Saadou	05/27/2022	8.2079973, -8.710944	Clear forests	A former cocoa plantation inside the classified forest of Mont Béro.	3	2	6	Compensation to free the classified forest.
		Agro-industrial agriculture	Saadou	05/27/2022	8.2087486, -8.7138173	Secondary forest	A former coffee plantation maintained using chemicals in the classified forest.	3	2	6	Compensate so that they can leave the classified forest.
		Agro-industrial agriculture	Saadou	05/27/2022	8.2096287, -8.7219689	Shrubby savannas	A new coffee plantation in the classified forest.	2	3	6	Just get out.
		Agro-industrial agriculture	Saadou	05/27/2022	8.2106531, -8.731352	Gallery forests	A coffee plantation on the banks of the Loh river in the gallery of the Mont Béro classified forest.	3	2	6	Compensate local residents.
		Agro-industrial agriculture	Saadou	05/28/2022	8.1810484, -8.7428719	Clear forests	An old, unmaintained cocoa coffee plantation in the classified forest.	3	2	6	Prohibit the maintenance of plantations and replanting.
		Agro-industrial agriculture	Saadou	05/28/2022	8.1808127, -8.7420485	Clear forests	A former cocoa plantation inside the classified forest of Mont Béro.	3	2	6	Make them run away into the classy forest of Mont Béro.
		Agro-industrial agriculture	Saadou	05/28/2022	8.1932605, -8.720673	Clear forests	A former coffee plantation inside the classified forest of Mont Béro	3	2	6	Prohibit the maintenance of plantations in the classified forest.
		Agro-industrial agriculture	Saadou	05/24/2022	8.1958994, -8.7426029	Clear forests	A former coffee plantation maintained in the classified forest of Mont Béro.	3	2	6	The measure to be taken is to compensate them and prohibit them from entering the classified forest.
		Agro-industrial agriculture	Saadou	05/27/2022	8.2088046, -8.7207824	Shrubby savannas	A cashew plantation in the classified forest.	2	2	4	To make them flee into the classified forest.
		Agro-industrial agriculture	Saadou	05/26/2022	8.1957234, -8.7459568	Clear forests	A new cocoa plantation in the classified forest of Mont Béro.	1	3	3	The measure to be taken is to clear out into the classified forest.
		Agro-industry farming	Saadou	05/27/2022	8.1914455, -8.7129399	Clear forests	An old, unmaintained coffee plantation in the classified forest of Mont Béro.	1	2	2	Give up for now.
		Shifting agriculture	Laminata	01/06/2022	8.1936489, -8.664287	Gallery forests	Field on a hillside in the classified forest of Mont Béro.	3	3	9	The guy was summoned, he had made a commitment to drop out.
		Shifting agriculture	Mangana	04/06/2022	8.2621844, -8.6984714	Lowland crops	A basin exploited within the classified forest of Mont Béro.	3	3	9	Anilée the convention of exploitation of the lowlands within the classified forest.
		Shifting agriculture	Ouléouon	05/29/2022	8.1339719, -8.6835943	Gallery forests	A lowland under agricultural exploitation within the classified forest of Mont Béro.	4	3	12	The ban on lowlands in the classified forest of Mont Béro.
		Shifting agriculture	Saadou	05/27/2022	8.2048429, -8.7081827	Grassy savannas	A field on a steep hillside in the classified forest of Mont Béro.	3	3	9	Clear out and reforest the degraded area.
		Shifting agriculture	Saadou	05/26/2022	8.1970226, -8.7421401	Gallery forests	Basin in exploitation with temporary hydromorphism in the classified forest of Mont Béro.	2	3	6	The exploitation of lowlands within the classified forest must be prohibited.
		Shifting agriculture	Saadou	05/28/2022	8.1790762, -8.7409137	Rainfed crops and fallow land	yam field inside the classified forest of Mont Béro.	1	3	3	To destroy.
		Small-holder farming	Kabiéta	02/06/2022	8.1695476, -8.7031109	Rainfed crops and fallow land	An old, unmaintained banana plantation in the classified forest of Mont Béro.	1	2	2	Ban maintenance.
		Small-holder farming	Laminata	05/30/2022	8.1987235, -8.6938283	Degraded, secondary and transitional forests	A new banana plantation was created in the classified forest of Mont Béro after the bushfire.	3	3	9	To be destroyed only.
		Small-holder farming	Laminata	05/30/2022	8.1933228, -8.6961213	Degraded, secondary and transitional forests	A new banana plantation in the classified forest of Mont Béro.	2	3	6	It's about chasing them away into the classy forest of Mont Béro
		Small-holder farming	Laminata	05/30/2022	8.1850707, -8.6946667	Clear forests	A lowland exploited in the classified forest of Mont Béro.	2	3	6	Eliminate the exploitation of lowlands in the classified forest.
		Small-holder farming	Laminata	05/31/2022	8.2006696, -8.6526555	Dense forests	An old, unmaintained banana plantation in the classified forest of Mont Béro.	3	2	6	Prohibit the maintenance of plantations in the classified forest.
		Small-holder farming	Laminata	05/31/2022	8.2052294, -8.649899	Degraded, secondary and transitional forests	A banana plantation inside the classified forest of Mont Béro.	3	2	6	Clear out the residents in the classified forest.
		Small-holder farming	Laminata	01/06/2022	8.2093638, -8.6726246	Degraded, secondary and transitional forests	A former banana plantation in the classified forest of Mont Béro.	3	2	6	Prohibit the maintenance of plantations in the classified forest.
		Small-holder farming	Laminata	01/06/2022	8.2126681, -8.6728916	Degraded, secondary and transitional forests	A new, unmaintained banana plantation in the classified forest of Mont Béro.	2	3	6	Prohibit the maintenance of plantations in the classified forest.
		Small-holder farming	Laminata	05/30/2022	8.1912386, -8.6956155	Gallery forests	Former banana plantation in the classified forest of Mont Béro	2	2	4	To chase them away into the cool forest of Mont Béro.
		Small-holder farming	Laminata	05/30/2022	8.1992144, -8.6946463	Clear forests	banana plantation in the classified forest of Mont Béro.	2	2	4	Ban maintenance.
		Small-holder farming	Laminata	05/31/2022	8.2066937, -8.6490947	Clear forests	A banana plantation inside the classified forest of Mont Béro.	2	2	4	Ban the maintenance of plantations, create development projects for local residents.
		Small-holder farming	Laminata	01/06/2022	8.2220128, -8.6719602	Dense forests	A banana plantation inside the classified forest of Mont Béro towards the source of the Oulé river.	2	2	4	Ban the maintenance of plantations.
		Small-holder farming	Mangana	04/06/2022	8.2651905, -8.7032255	Rainfed crops and fallow land	An untended banana plantation.	3	2	6	Prohibit maintenance of the plantation.
		Small-holder farming	Ouléouon	05/29/2022	8.123225, -8.676724	Transitional shrub formation	Lowland exploited in the classified forest of Mont Béro.	4	3	12	To make them flee into the classified forest.
		Small-holder farming	Ouléouon	05/29/2022	8.1265119, -8.6828508	Lowland crops	Lowland farmland within the classified forest of Mont Béro.	3	3	9	Prohibit the exploitation of lowlands within the classified forest of Mont Béro.
		Small-holder farming	Ouléouon	05/29/2022	8.1272377, -8.6757214	Rainfed crops and fallow land	A lowland plowed by oxen in the classified forest of Mont Béro.	3	3	9	Ban the exploitation of lowlands in the classified forest.
		Small-holder farming	Saadou	05/28/2022	8.1774959, -8.7431661	Palm groves	A banana plantation inside the classified forest of Mont Béro.	4	3	12	Prohibit maintenance and re-upholstery.
		Small-holder farming	Saadou	05/26/2022	8.1974338, -8.7457293	Clear forests	It is a cassava field in the classified forest of Mont Béro.	3	3	9	An activity prohibited inside the classified forest.
		Small-holder farming	Saadou	05/27/2022	8.2024662, -8.7148478	Lowland crops	A field of eggplants and combo in the classified forest.	3	3	9	Drive out the residents in the lowlands.
		Small-holder farming	Saadou	05/26/2022	8.1980382, -8.745524	Lowland crops	Lowlands currently being exploited within the classified forest of Mont Béro.	2	3	6	The exploitation of lowlands in the classified forest is an activity which causes the disappearance of amphibians due to the use of chemical products.
		Small-holder farming	Saadou	05/27/2022	8.2033327, -8.7088473	Rainfed crops and fallow land	A former banana plantation in the classified forest.	3	2	6	Do everything to compensate local residents for abandoning the classified forest.
		Small-holder farming	Saadou	05/27/2022	8.2048791, -8.7089081	Rainfed crops and fallow land	A new banana and taro plantation in the classified forest.	1	3	3	The only way is to drive them out into the classified forest.
	Wood and pulp plantations									0
	Livestock Farming & Ranching	Nomadic grazing	Saadou	05/28/2022	8.1876285, -8.7500281	Shrubby savannas	Livestock breeding inside the classified forest of Mont Béro.	3	3	9
	Livestock Farming & Ranching	Nomadic grazing	Saadou	05/28/2022	8.1902833, -8.7606201	Shrubby savannas	Livestock breeding in the classified forest of Mont Béro.	4	3	12
	Livestock Farming & Ranching	Smallholder Grazing, ranching or farming	Laminata	2022-05-31	8.2064067, -8.6333043	Shrubby savannas	Breeding inside the classified forest of Mont Béro.	4	3	12	Clear out the breeders in the classified forest of Mont Béro, because bush fires are often caused by them.
	Livestock Farming & Ranching	Agro-industry pasture, livestock or agriculture								0
	Marine and freshwater aquaculture									0
3. Energy production and mining
	Oil & Gas drilling									0
	Mining & Quarrying									0
	Renewable energy									0
4. Transport and service corridors
	Roads & Railroads		Saadou	05/26/2022	8.2017001, -8.7414197	Road and rail networks and associated areas	National road which passes inside the classified forest.	3	2	6	National road which is inevitable.
	Roads & Railroads		Saadou	05/26/2022	8.1885502,-8.7449451	Road and rail networks and associated areas	It is a road that crosses the classified forest.	3	2	6	The roads facilitate access for agents controlling the classified forest.
	Roads & Railroads		Saadou	05/26/2022	8.1949563,-8.7440594	Road and rail networks and associated areas	A motorcycle road inside the classified forest of Mont Béro.	2	2	4	An unavoidable route because it allows us to visit the classified forest.
	Roads & Railroads		Saadou	05/28/2022	8.1781133,-8.7433437	Road and rail networks and associated areas	A trail inside the classified forest of Mont Béro.	2	2	4	An inevitable track.
	Roads & Railroads		Saadou	05/28/2022	8.194351,-8.7208153	Road and rail networks and associated areas	A road that crosses the classified forest of Mont Béro.	2	2	4	A road that allows forest control.
	Roads & Railroads		Ouléouon	05/29/2022	8.1306776,-8.6813122	Road and rail networks and associated areas	A road inside the classified forest.	2	2	4	Inevitable because the road allows us to patrol the classified forest of Mont Béro.
	Roads & Railroads		Laminata	05/31/2022	8.1957898,-8.6572804	Road and rail networks and associated areas	A road that crosses the classified forest of Mont Béro.	2	2	4	The road is unavoidable in the classified forest.
	Roads & Railroads		Laminata	01/06/2022	8.2083908,-8.6723967	Road and rail networks and associated areas	A road that crosses the classified forest of Mont Béro.	2	2	4	The road is unavoidable in the forest.
	Roads & Railroads		Mangana	03/06/2022	8.2639061,-8.7118713	Road and rail networks and associated areas	A road that leads into the classified forest.	2	2	4	The road is unavoidable in the classified forest.
	Utility & Service Lines									0
	Shipping lanes									0
	Flight paths									0
5. Use of biological resources
	Hunting & Collecting Terrestrial animals	Intentional use	Saadou	05/28/2022	8.1804074 -8.7414259	Forest plantations and reforestation	A case collected in the plantation in a classified forest.	1	3	3	Ban on hunting in the classified forest.
		Intentional use	Laminata	05/30/2022	8.1875819 -8.6966123	Clear forests	Poaching, cable trap inside the classified forest of Mont Béro.	2	3	6	Formally prohibited in the classified forest.
		Intentional use	Laminata	05/30/2022	8.1939717 -8.6956233	Degraded, secondary and transitional forests	Poaching, cable trap in the classified forest of Mont Béro.	1	3	3	Formally prohibited in the classified forest.
		Intentional use	Laminata	05/31/2022	8.2047421 -8.6352935	Dense forests	A 12 gauge case picked up inside the classified forest of Mont Béro (on Mont Rouge).	1	2	2	Ban hunting in the classified forest of Mont Béro.
		Intentional use	Kabiéta	02/06/2022	8.1763369 -8.7100431	Degraded, secondary and transitional forests	A 12 gauge case picked up in the classified forest of Mont Béro.	2	3	6	Hunting in the classified forest is prohibited.
		Intentional use	Kabiéta	02/06/2022	8.1739433 -8.7095233	Rainfed crops and fallow land	Cable trap inside the classified forest of Mont Béro.	1	3	3	Hunting is prohibited in the classified forest.
		Intentional use	Mangana	04/06/2022	8.2600493 -8.6845743	Dense forests	A case picked up on a hunting trail in the classified forest of Mont Béro.	1	3	3	Hunting is prohibited inside the classified forest.
	Gathering Terrestrial Plants	Intentional use								0
	Gathering Terrestrial Plants	Unintended use								0
	Logging and wood harvesting
	Logging and wood harvesting	Intentional use (small scale)								0
	Logging and wood harvesting	Intentional use (small scale)								0
	Logging and wood harvesting	Intentional (large-scale) use								0
	Logging and wood harvesting	Unintentional use (small scale)								0
	Logging and wood harvesting	Unintentional (large-scale) use								0
	Fishing & Harvesting Aquatic Resources
	Fishing & Harvesting Aquatic Resources	Intentional use (small scale)								0
	Fishing & Harvesting Aquatic Resources	Intentional use (small scale)								0
	Fishing & Harvesting Aquatic Resources	Intentional use (small scale)								0
	Fishing & Harvesting Aquatic Resources	Intentional (large-scale) use								0
	Fishing & Harvesting Aquatic Resources	Unintentional use (small scale)								0
	Fishing & Harvesting Aquatic Resources	Unintentional (large-scale) use								0
6. Human intrusions and disturbances
	Recreational activities									0
	War and civil unrest/Military exercises									0
	Work & other activities									0
7. Modifications of natural systems										0
	Fire & Fire Suppression
	Fire & Fire Suppression	Increase in frequency/intensity of fires	Laminata	01/06/2022	8.2063634,-8.6726748	Degraded, secondary and transitional forests	A bushfire that ravaged a large part of the classified forest of Mont Béro.	4	2	8	Awareness must be raised for bushfire management.
		Increase in frequency/intensity of fires	Saadou	05/28/2022	8.1786148,-8.739928	Forest plantations and reforestation	After the bush fire, there is regeneration of vegetation.	3	2	6	Bring out the breeders and set up a reforestation project in the areas degraded by the bush fire, in the classified forest of Mont Béro.
		Increase in frequency/intensity of fires	Saadou	05/28/2022	8.17366,-8.7068467	Clear forests	A bushfire that ravaged the classified forest of Mont Béro.	3	2	6	Clear out the residents in the classified forest.
		Increase in frequency/intensity of fires	Ouléouon	05/29/2022	8.1227821,-8.6688416	Palm groves	After the bushfire, the vegetation recovers.	3	2	6	Establish a system to combat bushfires in all villages bordering Mont Béro.
		Increase in frequency/intensity of fires	Laminata	05/30/2022	8.1899383,-8.6950543	Gallery forests	Bushfire inside the Mont Béro forest.	3	2	6	We are proposing a reforestation project in the Mont Royal forest.
		Increase in frequency/intensity of fires	Laminata	05/30/2022	8.1977967,-8.695125	Dense forests	The damage caused by the bush fires which destroyed the dambema in the classified forest of Mont Béro.	3	2	6	Make fires and raise awareness among local residents in the fight against bush fires.
		Increase in frequency/intensity of fires	Laminata	05/31/2022	8.2066797,-8.6374683	Dense forests	After the bushfire, there is a reconstitution of vegetation.	3	2	6	Clear out all the breeders in the classified forest.
		Increase in frequency/intensity of fires	Laminata	01/06/2022	8.206115,-8.67084	Degraded, secondary and transitional forests	After the bushfire passed through the classified forest of Mont Béro, there is a reconstitution of the vegetation.	3	2	6	We ask partners and the state for reforestation projects.
		Increase in frequency/intensity of fires	Kabiéta	02/06/2022	8.1648468,-8.7040819	Clear forests	bushfire in the classified forest of Mont Béro which ravaged a former banana plantation.	3	2	6	Ban livestock breeding and agriculture in the classified forest.
		Increase in frequency/intensity of fires	Kabiéta	02/06/2022	8.1609009,-8.7047805	Clear forests	A fire that ravaged part of the vegetation of Mont Béro.	2	2	4	Conduct an awareness session with the population, to be able to effectively fight against bush fires.
	Fire & Fire Suppression	Suppression of fire frequency/intensity								0
	Dams and water management/use									0
	Other ecosystem changes	Abstraction of surface water								0
		Abstraction of ground water								0
		Small Dams								0
		Large Dams								0
8. Invasive or problematic species, genes, diseases										0
	Invasive Non-Native/Alien Species
	Problematic Native Species									0
9. Pollution										0
	Domestic and urban wastewater									0
	Industrial & Military Effluents
	Industrial & Military Effluents	Oil spills								0
	Industrial & Military Effluents	Mining seepage								0
	Agricultural & Forestry Effluents		Ouléouon	05/29/2022	8.123475,-8.6785215	Secondary forest	The use of chemicals in the lowlands within the classified forest of Mont Béro.	4	3	12	Ban the use of chemicals that destroy aquatic species in the classified forest.
	Garbage and solid waste									0
	Airborne pollutants									0
		Acid rain, smog, ozone								0
10. Geological events
	Volcanoes									0
	Earthquakes									0
	Avalanches and landslides									0
11. Climate change and severe weather events
	Habitat shifting alteration									0
	Drought									0
	Temperature extremes									0
	Storms & Flooding									0
	Other									0
TOTAL SCORE										591
									Low	2
									Low	3
									med	6
									med	0
									med	35
									high	7
									high	9
									v.high	0
									v.high	3

## Sheet:  Diecke
IUCN Threats to CEPF Project Risk Register			Last Review Date: June 2022				Threat level and description of activities						Weak	AVERAGE	Pupil	Very High
Protected Area: DIECKE FORET CLASSIFIED		Evaluation date:	Area/Location	Date recorded	Contact details	Habitat	Description of activities	Risk scores (3 = high), 1 = low)	Calendar (Past = 2, Current = 3, Future = 1)	Overall impact level	Mitigation measures		1-3	4-6	7-9	10-12
Threat Class	Under Classification_1	Under Classification_2
1. Residential & Commercial													Total Score Overall Impact Level
	Habitat & Urban Areas		Lowi FC diecke	05/30/2022	7.4055152, -8.9372143	Dense forests	Human installation	3	2	6	Arrangements to be made and eviction
	Habitat & Urban Areas		Lowi Diecke	05/31/2022	7.4287826, -8.9396827	Lowland crops	Human settlement (residence cabin)	1	3	3	Patrol, awareness
	Commercial and industrial areas									0
	Tourism & Recreational areas									0
2. Agriculture & Aquaculture
	Agriculture & Perennial Non-Timber crops									0
		Shifting agriculture	Saoro	05/27/2022	7.4939417 -9.0064625	Lowland crops	Plain exploitation	2	3	6	Abandon
		Shifting agriculture	Lowi Dieck	05/30/2022	7.405974 -8.941995	Lowland crops	use of chemicals	2	3	6	Abandonment of the stockings
		Shifting agriculture	Lowi/Diecke	05/30/2022	7.4059864 -8.9420398	Lowland crops	use of chemicals	2	3	6	Patrol, awareness
		Shifting agriculture	Gbamou FC Diecke	03/06/2022	7.4727617 -9.05415	Lowland crops	Rice cultivation use herbicides	2	3	6	Patrol, awareness, relocation of occupants
		Small-holder farming	Lowi Diecke	05/31/2022	7.4168761 -8.9445966	Lowland crops	Use of herbicides	2	3	6	Patrol, awareness
		Agro-industry farming	Guepa/FC Diecke	01/06/2022	7.38427 -8.8824547	Degraded, secondary and transitional forests	Cocoa plantation, use of herbicides	1	3	3	Patrol, awareness and relocation of occupants
	Wood & Pulp Plantations									0
	Livestock Farming & Ranching									0
		Nomadic grazing								0
		Smallholder Grazing, ranching or farming								0
		Agro-industry pasture, livestock or agriculture								0
	Marine & freshwater aquaculture									0
3. Energy production and mining
	Oil & Gas drilling									0
	Mining & Quarrying									0
	Renewable Energy									0
4. Transport and service corridors
	Roads & Railroads									0
	Utility & Service Lines									0
	Shipping lanes									0
	Flight paths									0
5. Use of biological resources
	Hunting & Collecting Terrestrial animals									0
		Intentional use	Saoro_forest classified diecke	05/27/2022	7.4955687, -9.0029333	Dense forests	Poaching (luck)	2	3	6	Awareness raising
		Intentional use	Saoro	05/27/2022	7.4952602, -9.0026261	Dense forests	line of traps	2	3	6	Organization of patrols and awareness raising
		Intentional use	Guepa FC Diecke	02/06/2022	7.4079062, -8.8257423	Dense forests	Traps	1	3	3	Patrol, awareness
		Unintended use	Kolowi	05/29/2022	7.5015644, -8.9292353	Dense forests	Case next to a hunting trail.	1	2	2	Patrol and awareness
		Unintended use	Lowi FC diecke	05/30/2022	7.4000691, -8.9323515	Clear forests	Naturally disturbed dense forest	1	2	2	Awareness patrol
		Intentional use	Guepa/FC Diecke	02/06/2022	7.407122, -8.8245574	Dense forests	The hunt	1	2	2	Patrol
	Gathering Terrestrial Plants
		Intentional use	Oueta	November 2021	7.61882,-9.01873		Debarking of plant species (Parinari exelsa and Erythrophleum ivorense) for medicinal uses. Almost all of the bark on the foot of Parinari excelsa and 1/3 of the bark on the stem of Erythropleum ivorensis removed.	2	3	6
		Intentional use	North-east of the Gnei river at 900 m.	November 2021	7.64772,-9.00295	Gallery forest	Destruction of Raphia hookeri plants for the harvest of raffia wine. A few dozen plants destroyed.	2	3	6
		Intentional use	South-East side of the main road at 1.5 km	November 2021	7.46175,-8.86422	roadside	Collection and stripping of bark from species such as Annickia polycarpa, for medicinal use. 2/4 of the surface of the bark on the stem is removed.	2	3	6
		Intentional use	Inside the forest	November 2021	7.64774,-9.00296	Forest	Presence of empty cans under the feet of Raphia hookeri already exploited with destruction of the ecosystem. Three empty 20-liter cans and about ten dead feet on a surface area of 500 m².	2	3	6
		Intentional use	Northeast of the Mangué river	November 2021	7.63425,-9.03303	Gallery forest	Harvesting Raphia hookeri wine. About ten plants destroyed and a 700 m² space opened.	2	3	6
		Intentional use	On the edge of the Mangué river	November 2021	7.63406,-9.03371	Gallery forest	Harvesting Raphia hookeri wine from 8 already dead plants with clearing of an area of 1500 m².	2	3	6
		Intentional use	In the landlocked village of Lowi in the Diécké classified forest.	November 2021	7.40497,-8.93719	Village	Collection of sub-timber and woody forest products Laccosperma secundiflorum, Eremospatha macrocarpa and Calamus deerratus for crafts and construction. A total of about ten trees cut. In Lowi.	1	3	3
		Unintended use								0
	Logging and wood harvesting
		Intentional use (small scale)	Yonsono	November 2021	7.53934,-8.83218		Cutting some Terminalia ivorensis wood for carbonization	2	3	6
		Intentional use (small scale)	Kolowi	05/28/2022	7.484315, -8.9354097	Dense forests	Rattan cut	1	3	3	Patrol, awareness
		Intentional (large-scale) use								0
		Unintentional use (small scale)								0
		Unintentional (large-scale) use								0
	Fishing & Harvesting Aquatic Resources
		Intentional use (small scale)	Kolowi	05/28/2022	7.4841129, -8.9365503	Gallery forests	Artisanal fishing, the dam	1	3	3	Patrol organization and awareness raising
		Intentional use (small scale)	Kolowi FC Diecke	05/24/2022	7.4920128, -8.9333268	Dense forests	Fishing in dense forest at low altitude	1	3	3	Patrol and awareness
		Intentional use (small scale)	Gbamou/FC Diecke	03/06/2022	7.4732004, -9.0512954	Dense forests	Fishing (dam)	1	3	3	Awareness
		Intentional (large-scale) use								0
		Unintentional use (small scale)								0
		Unintentional (large-scale) use								0
6. Human intrusions and disturbances
	Recreational activities									0
	War and civil unrest/Military exercises									0
	Work & other activities		Nearly 2 km from the main Diécké road	November 2021	7.4634,-8.86549	roadside	Installation of two poachers' homes with watchtowers for smoking meat, destroying the nearby ecosystem. 3,500 m² cleared. Nearly 2 km from the main Diécké road.	3	3	9
	Work & other activities		Northwest of the Gnei river, about 2 km away.	November 2021	7.64538,-9.00208	Gallery forest	Camp of NWFP harvesters with watchtowers, fishing nets, cast net, and meat smoking equipment in a hut. 1000 m² cleared.	3	3	9
	Work & other activities		West side of the main Diécké-Guèpa road near a backwater.	November 2021	7.45194,-8.86058		Poachers' camp (wood cutting and clearing) Installation of a poachers' home.	2	3	6
	Work & other activities		West side of the main road after the backwater.	November 2021	7.45245,-8.86108	Gallery forest	Installation of a home for poaching. 1000 m² are sown to install the poachers' camp	2	3	6
	Work & other activities		On the poachers' trail (Dabema trail) next to a small stream.	November 2021	7.61882,-9.01873	Gallery forest	Setting up a poachers' camp. 800 m² cleared.	2	3	6
7. Modifications of natural systems										0
	Fire and Fire Suppression
		Increase in frequency/intensity of fires								0
		Suppression of fire frequency/intensity								0
	Dams and water management/use									0
	Other ecosystem changes	Abstraction of surface water								0
		Abstraction of ground water								0
		Small dams								0
		Large dams								0
8. Invasive or problematic species, genes, diseases										0
	Invasive Non-Native/Alien Species
	Problematic Native Species									0
9. Pollution										0
	Domestic and urban wastewater									0
	Industrial & Military Effluents
		Oil spills								0
		Mining seepage								0
	Agricultural & Forestry Effluents									0
	Garbage and solid waste									0
	Airbourne pollutants									0
		Acid rain, smog, ozone								0
10. Geological events
	Volcanoes									0
	Earthquakes									0
	Avalanches and landslides									0
11. Climate change and severe weather events
	Habitat shifting alteration									0
	Drought									0
	Temperature extremes									0
	Storms & Flooding									0
	Other									0
TOTAL SCORE										156

## Sheet:  Simandou South
IUCN Threats to CEPF Project Risk Register			Last Review Date: June 2022				Threat level and description of activities						Weak	AVERAGE	Pupil	Very High
Protected Area: PIC DE FON CLASSIFIED FOREST		Evaluation date:	Area/Location	Date recorded	Contact details	Habitat	Description of activities	Risk scores (3 = high), 1 = low)	Calendar (Past = 2, Current = 3, Future = 1)	Overall impact level	Mitigation measures		1-3	4-6	7-9	10-12
Threat Class	Under Classification_1	Under Classification_2
1. Residential & Commercial													Total Score Overall Impact Level
	Habitat & Urban Areas		PDF/ Dandano (Boo Camp)	02/06/2022	8.432882,-8.9195285	Discontinuous urban fabric and villages	Temporary Agro-Forestry Camp	1	3	3	Ban on maintenance of perennial plantations until further notice, Identification of planters, Immediate eviction in the premises and creation of AGR outside Classified Forests.
	Habitat & Urban Areas		PDF / Moribadou (Trash)	02/06/2022	8.5820359,-8.8659695	Discontinuous urban fabric and villages	Rio Tinto trash camp installation in a grass savannah	2	3	6	See the mining convention in a classified forest, the mining code and the environmental code.
	Commercial and industrial areas									0
	Tourism & Recreational areas									0
2. Agriculture & Aquaculture
	Agriculture and non-woody perennial crops
		Shifting agriculture	PDF/Dandano (Gnyalaou)	05/26/2022	8.4418143,-8.9306942	Rainfed crops and fallow land	Fallow plowed land, planted with banana trees.	3	3	9	Identification, disguise of the perpetrators (and accomplices) and their translation before the competent courts
		Shifting agriculture	PDF Tourela	05/29/2022	8.5095353,-8.9633718	Rainfed crops and fallow land	Field on a hillside in a secondary forest disturbed by human activities. Burning for clearance completed and semi-in progress near the boundary (conflict zone).	3	3	9	Identification of the perpetrator and transfer to the competent authority. Immediate eviction. Widespread awareness-raising among the local population and capacity building of conservators and Village Forest Management Committees (COGEF/ACCM)
		Shifting agriculture	PDF Dandano/Gnyalaou	05/26/2022	8.4400788,-8.9277785	Rainfed crops and fallow land	Rice and banana cultivation, plus camp installation.	3	3	9	Identification, immediate disguise of the perpetrators and their translation before the competent courts.
		Shifting agriculture	PDF Traorela	05/31/2022	8.643175,-8.9144651	Rainfed crops and fallow land	Rice on a hillside in a destroyed wooded savannah	3	3	9	Identification of the perpetrator and his/her translation before the competent courts. Capacity building of conservators and Village Forest Management Committees. Immediate eviction in places after harvesting
		Shifting agriculture	PDF /Traorela (Mamorodou)	05/31/2022	8.6348527,-8.9179693	Rainfed crops and fallow land	Rice on hillside associated with banana trees and corn in a disturbed secondary forest with closed canopy with tree felling.	3	3	9	Identify forest operators, bring them before the competent courts. Immediate eviction immediately after harvesting. Capacity building of conservators and Village Forest Management Committees
		Shifting agriculture	PDF Moribadou(Siatouro)	05/31/2022	8.6414629,-8.8677937	Rainfed crops and fallow land	Fallow plowed field in a wooded savannah devastated last year with felling of trees	3	3	9	Identify farmers, bring them before the competent courts. Proceed with their immediate eviction. Restore these areas with local species. Capacity building of conservators and Village Forest Management Committees
		Shifting agriculture	PDF / Moribadou (Siatouro)	05/31/2022	8.63801,-8.86819	Rainfed crops and fallow land	I am buying cleared land, semi-in progress in a destroyed wooded savannah with felling of trees.	3	3	9	Identify farmers and bring them before the competent courts. Proceed with their immediate eviction. Restore these areas with local species.
		Shifting agriculture	PDF/ Dandano (Gnyalaou)	05/26/2022	8.4417767,-8.9294982	Rainfed crops and fallow land	I bought banana and corn plantations	2	3	6	Identification, immediate disguise and translation of the perpetrators before the competent courts.
		Shifting agriculture	PDF/Dandano (Boo)	05/26/2023	8.4220326,-8.9340634	Rainfed crops and fallow land	Rice, Banana, Taro, Cassava, Corn, Pepper	2	3	6	Identify the operators and evict them. Propose income-generating activities in the villages.
		Shifting agriculture	PDF/Dandano (Gnyalaou)	05/26/2022	8.431072,-8.9362635	Rainfed crops and fallow land	Rice and banana plantation in a j'achère	2	3	6	Immediate disguise of the perpetrators and their translation before the competent courts
		Shifting agriculture	PDF/ Dandano (Beaou)	05/27/2022	8.4357472,-8.9862017	Degraded, secondary and transitional forests	Clearing and felling trees for the field.	3	2	6	Identification disguise of the perpetrators and their translation before the competent courts. This present field has been abandoned and the perpetrators arrested thanks to the efforts of the Dandano Conservative Agents
		Shifting agriculture	PDF/Dandano (Beaou)	05/27/2022	8.4378285,-8.9814148	Agroforestry systems (association of perennial crops and forest species)	Banana plantation, Manioc niebe and Taro associated in a secondary forest disturbed by human activities.	2	3	6	Identification of the authors, stop the interview until further notice. Proposal of the AGN in the Villages and disguise in the future
		Shifting agriculture	PDF/ Nawoinsou (Basayie)	05/28/2022	8.4816751,-8.9727852	Rainfed crops and fallow land	Unmaintained banana plantation in a secondary forest disturbed by human action.	2	3	6	Raising awareness among local residents of the importance of the forest. Capacity building for conservators and COGEF/ACCM. Identification of perpetrators and their disguise in the future
		Shifting agriculture	PDF Tourela	05/29/2022	8.5086578,-8.9624633	Lowland crops	Clearing and felling of woods in a covered lowland and new near the abandoned boundary.	2	3	6	Identification of the perpetrators and eviction from the premises. Capacity building of conservators and Village Forest Management Committees (COGEF/ACCM)
		Shifting agriculture	PDF Tourela	05/29/2022	8.5060132,-8.963629	Rainfed crops and fallow land	Unmaintained banana plantation in a secondary forest disturbed by human activity	2	3	6	Identification of the author and stopping of maintenance until further notice. Reinforce surveillance
		Shifting agriculture	PDF Tourela	05/29/2022	8.499229,-8.9692594	Rainfed crops and fallow land	Banana plantation maintained in a secondary forest disturbed by human activities	2	3	6	Identification of authors stop the interview until further notice.
		Shifting agriculture	PDF Traorela	05/31/2022	8.6504234,-8.9139791	Rainfed crops and fallow land	Vegetable garden of chilli pepper, eggplant and corn in a non-flooded plain (transit zone between savannah and gallery forest).	2	3	6	Regular monitoring of conservation agents. Encourage market gardening activity outside Classified Forests.
		Shifting agriculture	PDF Traorela	05/31/2022	8.6462878,-8.9142071	Lowland crops	Market gardening in a formerly worked lowland	2	3	6	Development and establishment of market gardening groups in riverside villages outside Classified Forests. Regular monitoring by conservators in these areas
		Shifting agriculture	PDF Moribadou Ouleba	01/06/2022	8.6131688,-8.8775863	Rainfed crops and fallow land	Field on burnt hillside with felling of trees in a destroyed wooded savannah	2	3	6	Identification of the perpetrators and stopping activities until further notice. Proceed with their immediate eviction. Wide awareness-raising among the local population on the boundary of the classified forest
		Shifting agriculture	PDF Moribadou Ouleba	02/06/2022	8.6096551,-8.8808044	Rainfed crops and fallow land	Field on a plowed hillside in a wooded savannah devastated by human activity.	2	3	6	Identification of the perpetrators and their translation before the competent courts. Immediate eviction in the places. Capacity building of conservators and Village Forest Management Committees.
		Shifting agriculture	PDF/Nawoinsou (Basayie)	05/28/2022	8.481486,-8.9757576	Rainfed crops and fallow land	Abandoned field in a secondary forest disturbed by human activity.	1	2	2	Capacity building for conservators and Village Forest Management Committees. Broad awareness-raising among the local population on the importance of the forest.
		Shifting agriculture	PDF/Nawoinsou (Basayie)	05/28/2022	8.4835784,-8.9782298	Degraded, secondary and transitional forests	Abandoned clearing in a secondary forest disturbed by human activity and dominated by Cromoina odorata.	1	2	2	Awareness, Support and Capacity Building for Conservators and Village Forest Management Committees (COGEF ACCM)
		Shifting agriculture	PDF /Nawoinsou (Basayie)	05/28/2022	8.4878228,-8.975286	Rainfed crops and fallow land	Clearing in dense forest abandoned thanks to the support of conservationists.	1	2	2	Support and Strengthen the capacity of conservation agents and the Forest Management Committees and Hunters' Brotherhood (COGEF/ACCM). Broad awareness among the local population of the virtues of the classified forest.
		Small-holder farming	PDF Traorela	05/31/2022	8.6471404,-8.9149159	Rainfed crops and fallow land	Rice on hillside with banana trees and cutting down trees in a destroyed wooded savannah	3	3	9	Identify the owner, bring him before the competent courts. Proceed with his immediate eviction immediately after the harvest. Capacity building of conservators and Village Forest Management Committees
		Small-holder farming	PDF/Dandano(Boo	05/26/2022	8.4207257,-8.9338239	Agroforestry systems (association of perennial crops and forest species)	Banana trees, Coffee trees and Cola tree	2	3	6	Census all planters and compensate them outside Classified Forests in the future. Prohibit all maintenance of perennial plantations until further notice.
		Small-holder farming	PDF/Dandano (Beaou)	05/27/2022	8.4342802,-8.9885533	Rainfed crops and fallow land	Banana plantation in an unmaintained garden.	2	3	6	Identify the perpetrators and stop maintenance until further notice. In the meantime, accept the cut without maintenance.
		Small-holder farming	PDF/ Dandano (Gnafreta 1)	05/27/2022	8.441461,-8.976036	Rainfed crops and fallow land	Banana plantation maintained in a secondary forest disturbed by human activities.	2	3	6	Identification of the authors and stopping the interview until further notice. Proposal of AGR in the riverside villages outside the Classified Forest.
		Small-holder farming	PDF/Nawoinsou (Basayie)	05/28/2022	8.4840426,-8.9718443	Rainfed crops and fallow land	Banana plantation with a tendency to abandonment in a garden dominated by Cromoina odorata	2	3	6	Identification of the perpetrators and stopping the maintenance until further notice. Capacity building of the curators. Awareness raising among the local population
		Small-holder farming	PDF/Banko (Gambadou)	05/30/2022	8.5166332,-8.9510635	Rainfed crops and fallow land	Unmaintained banana plantation in a disturbed secondary forest with closed canopy	2	3	6	Ban maintenance until further notice. Capacity building for conservators and Village Forest Management Committees.
		Small-holder farming	PDF/ Banko (Saadou)	05/30/2022	8.5157391,-8.9577519	Agroforestry systems (association of perennial crops and forest species)	Associated coffee and banana plantation maintained in a disturbed secondary forest with a closed canopy	2	3	6	Stop maintenance until further notice. Review the content of the development and co-management plan for classified forests in Forest Guinea. Capacity building for conservators and Village Forest Management Committees COGEF and ACCM
		Small-holder farming	PDF/Nawoinsou (Basayie)	05/28/2022	8.4847687,-8.975168	Rainfed crops and fallow land	Abandoned banana plantation in a secondary forest in reconstitution with closed canopy, disturbed by human action	1	2	2	Raising awareness among local residents about the importance of forests. Strengthening the capacities of conservators and Village Forest Management Committees (COGEF/ACCM)
		Agro-industry farming	PDF/ Banko (Gambadou)	05/30/2022	8.5164824,-8.9490921	Rainfed crops and fallow land	Coffee plantation maintained in a dense closed canopy forest disturbed and with tree felling.	3	3	9	Identification of the planter and his translation before the competent courts. Stop the maintenance until further notice. Capacity building of conservators and Village Forest Management Committees. Proposal of AGR in the riverside villages
		Agro-industry farming	PDF/ Banko (Gambadou)	05/30/2022	8.5167353,-8.9486058	Agroforestry systems (association of perennial crops and forest species)	Associated food and industrial crops in a well-maintained dense disturbed forest (non-flooded plain).	3	3	9	Stop maintenance until further notice. Proposal of AGR in the riverside villages. Capacity building of conservators and Village Forest Management Committees. Review the content of the development plan and co-management of classified forests in Forest Guinea
		Agro-industry farming	Fon Peak / Dandano (Boo)	05/26/2022	8.4197108,-8.9336359	Agroforestry systems (association of perennial crops and forest species)	Associated coffee and banana plantation	2	3	6	Identify all planters and compensate them outside Classified Forests in the future
		Agro-industry farming	PDF/Dandano (Beaou)	05/27/2022	8.4371402,-8.9839563	Rainfed crops and fallow land	Coffee plantation in a secondary forest disturbed by human action.	2	3	6	Census of all planters in classified forests and make proposals for AGR in the dismayed villages. Stop the maintenance of plantations until further notice.
		Agro-industry farming	PDF/ Banko (Gambadou)	05/30/2022	8.5201881,-8.942347	Agroforestry systems (association of perennial crops and forest species)	Coffee plantation and fruit trees in a dense forest disturbed by human activity, partially maintained	2	3	6	After Identification of the planters, stop the maintenance until further notice. Creation of AGR in the riverside villages. Capacity building of the conservators and Village Forest Management Committees.
		Agro-industry farming	PDF /Banko (Gambadou)	05/30/2022	8.5171229,-8.9435096	Dense forests	Cocoa plantation maintained in a dense forest with a closed canopy disturbed by human anthropic actions.	2	3	6	Identification of all planters and stop maintenance until further notice. Capacity building of conservators and Village Forest Management Committees. Creation of AGRs in neighboring villages to mitigate illegal activities in classified forests.
		Agro-industry farming	PDF/Banko(Gambadou)	05/30/2022	8.5175944,-8.9490616	Agroforestry systems (association of perennial crops and forest species)	Cocoa plantation maintained in a dense closed canopy forest	2	3	6	Identification of the perpetrators and stopping the interview until further notice. Proposal of support measures for local residents for their eviction in the future.
		Agro-industry farming	PDF/ Traorela	05/31/2022	8.6600954,-8.9111101	Agroforestry systems (association of perennial crops and forest species)	Coffee plantation, associated with fruit trees maintained in a gallery forest disturbed by human activity.	2	3	6	Identification of owners, stop maintenance until further notice. Review the convention of perennial plantations in the classified forest of Pic de Fon
		Agro-industry farming	PDF Traorela	05/31/2022	8.6486039,-8.9144039	Agroforestry systems (association of perennial crops and forest species)	Coffee plantation associated with fruit trees in a gallery forest disturbed by human activity	2	3	6	Identify forest operators, stop maintenance until further notice. Capacity building of conservators and Village Forest Management Committees, proposal of AGR in riverside villages.
		Agro-industry farming	PDF/ Dandano (Gnyalaou)	05/26/2022	8.4330267,-8.9356275	Agroforestry systems (association of perennial crops and forest species)	Cocoa plantation maintained in closed canopy secondary forest	2	3	6	Identification and disguise of the perpetrators and their translation before the competent courts
	Wood and pulp plantations									0
	Livestock Farming & Ranching	Nomadic grazing								0
		Smallholder Grazing, ranching or farming	PDF Balladou	04/06/2022	8.4275671,-8.8674681	Shrubby savannas	Ndama Park in a degraded shrub savannah and ox installation with wood cutting for the hedge	2	3	6	Review the convention for parking cattle in classified forests. Raising awareness among breeders about cutting down tree species for hedges or enclosures
		Agro-industry pasture, livestock or agriculture								0
	Marine and freshwater aquaculture									0
3. Energy production and mining
	Oil and gas drilling									0
	Mining and Quarrying		PDF/Dandano (Boo)	05/26/2022	8.4337244,-8.9213095	Courses and waterways	Illegal gold panning in a lowland	3	3	9	Immediate and immediate disguise. Support and capacity building of conservators in anti-poaching.
	Mining and Quarrying		Pic de Fon /Dandano (Salawolozou)	05/24/2022	8.4128383,-8.9353381	Lowland crops	Illegal gold panning in a lowland	2	3	6	Awareness raising and immediate eviction in the premises
	Mining and Quarrying		PDF Moribadou Ouleba	02/06/2022	8.6089742,-8.8814892	Lowland crops	Gold panning in a degraded lowland in a wooded savannah	2	3	6	Immediate eviction of the premises. Widespread awareness-raising among the local population on illegal gold panning in classified forests.
	Mining and Quarrying		PDF Balladou	04/06/2022	8.4306427,-8.8641425	Lowland crops	Illegal gold panning in a lowland covered with degraded mytragina stuloposa near the boundary of the classified forest	2	3	6	Broad awareness of the local population. Proposal of AGR in local villages to reduce anthropogenic pressure in classified forests
	Mining and Quarrying		PDF/ Moribadou (Ouleba)	01/06/2022	8.6087165,-8.8785921	Shrubby savannas	Illegal gold panning in a degraded shrub savannah	2	2	4	Regular monitoring, Capacity building of conservators and Village Forest Management Committees. Immediate eviction in the areas. Widespread awareness of the population on gold panning
	Mining and Quarrying		PDF /Fooma (wizie)	03/06/2022	8.4944259,-8.8836766	Road and rail networks and associated areas	Road and survey in a wooded savannah degraded by Rio Tinto exploitation	2	2	4	See the mining agreement in a classified forest. The mining and environmental code and the development plan
	Mining and Quarrying		PDF Fooma board Kango	03/06/2022	8.4886456,-8.8721066	Courses and waterways	Illegal gold panning along the Kango river in a covered lowland	2	2	4	Broad awareness-raising among the local population on illegal gold mining in classified forests. Capacity building for conservators and Village Forest Management Committees. Support the local community in AGRs.
	Renewable energy									0
4. Transport and service corridors
	Roads and Railroads		Pic de Fon / Dandano (Salawolozou)	05/26/2022	8.4154078,-8.9357279	Road and rail networks and associated areas	Motorcycle and pedestrian track	1	3	3	Slow down and prohibit the action of these users.
	Roads and Railroads		PDF/Dandano (Gnafreta 1)	05/27/2022	8.4416786,-8.9723117	Road and rail networks and associated areas	Busy motorcycle and pedestrian track entering classified forest	3	3	9	Slow down the action of these rolling machines which serve as means of transport for forest products. Identify all the operators in this area.
	Roads and Railroads		PDF/ Dandano (Gnafreta 2 Carrefour)	05/27/2022	8.4377398,-8.965709	Road and rail networks and associated areas	Road passable by motorcycles, vehicles and farmers in classified forest	3	3	9	Stop the action and use of these means of transport in classified forests. Identify farmers in this area and disguise them in the future. Stop the maintenance of perennial plantations until further notice.
	Roads and Railroads		PDF/ Banko (Gambadou)	05/30/2022	8.518121,-8.942486	Dense forests	Perennial plantation operator trail inside the dense closed canopy forest.	2	3	6	Identification of all forest operators. Ban on plantation maintenance until further notice. Capacity building of conservators and Village Management Committees, Proposal of AGR in riverside villages.
	Roads and Railroads		PDF Traorela	05/31/2022	8.6587693,-8.9111578	Road and rail networks and associated areas	Motorcycle and pedestrian track passable in all seasons in a wooded savannah with open canopy connecting Traorela to Lamadou	2	3	6	Identify all lowland operators and perennial plantations. Capacity building of conservators and Village Forest Management Committees COGEF/ACCM
	Roads and Railroads		PDF Traorela	05/31/2022	8.6762034,-8.8983052	Forest plantations and reforestation	Reforestation with Gmerina arborea in a restored happy savannah	2	2	4	Encourage the restoration of areas degraded by intense bushfires. Put out early fires in time and create firebreaks around forest plantations. Strengthen the capacities of conservators and village committees to combat bushfires and forest fires.
	Roads and Railroads		PDF/ Nionsomoridou (Siatouro)	05/31/2022	8.6728135,-8.8679144	Road and rail networks and associated areas	Road passable by the Rio Tinto Company in a shrubby savannah degraded by the action of the bush fire.	2	2	4	Review the mining convention, the mining code and the environmental code in a classified forest.
	Roads and Railroads		PDF Nionsomoridou (Siatouro)	05/31/2022	8.6818148,-8.8716246	Road and rail networks and associated areas	Motorcycle and pedestrian track passable in a wooded savannah in progressive reconstruction	2	3	6	Identify all users of this track, fix signs at the entrance and exit. Reinforce surveillance
	Roads and Railroads		PDF / Moribadou (Siatouro)	05/31/2022	8.6315359,-8.8676261	Road and rail networks and associated areas	Road passable by the Rio Tinto Company in a shrub savannah under reconstruction	2	2	4	See the mining companies' convention on classified forests, the mining and environmental code.
	Roads and Railroads		PDF /Fooma (Farafina)	03/06/2022	8.5063049,-8.8654472	Road and rail networks and associated areas	Motorcycle and pedestrian track passable in a shrubby savannah in progressive reconstruction with open canopy	2	3	6	Identify farmers. Raise awareness among the local population. Regular monitoring and capacity building for conservators and Village Forest Management Committees (COGEF ACCM)
	Utility & Service Lines									0
	Shipping lanes									0
	Flight paths									0
5. Use of biological resources
	Hunting & Collecting Terrestrial animals									0
		Intentional use	PDF/ Nawoinsou (Bassayie)	05/28/2022	8.4857579,-8.9775395	Dense forests	Trap hunting in a dense forest with a closed canopy near the boundary.	1	3	3	Identification of all residents along the boundary. Support and Strengthening the capacity of conservation agents to keep them in their posts.
		Intentional use	PDF/Nawoinsou (Basayie)	05/28/2022	8.4816906,-8.9807562	Dense forests	Trap line (2 traps) in a dense forest with a closed canopy	1	3	3	Raising awareness among local residents about hunting and the harmful effects of traps in classified forests. Census of local residents around the forest. Support and capacity building for conservators and Village Forest Management Committees (COGEF ACCM)
		Intentional use	PDF/ Fooma (wizie)	03/06/2022	8.4977149,-8.8804705	Wooded and tree-filled savannahs	Animal hunting with a 12 gauge shotgun (1 case collected) in a wooded savannah between two grassy savannahs.	1	2	2	Identification of all holders of 12-gauge rifles. Awareness raising on poaching in classified forests. Capacity building of conservators and Village Forest Management Committees
		Unintended use								0
		Unintended use								0
		Unintended use								0
	Gathering Terrestrial Plants
		Intentional use	PDF/ Fooma (Farafina)	03/06/2022	8.5081601,-8.8705887	Wooded and tree-filled savannahs	Cutting a Xylopia aethiopica plant for harvesting in a wooded savannah	2	2	4	Broad awareness of the local population for the harvest of PNL and Lines. Capacity building of conservators and Village Forest Management Committees
		Intentional use								0
		Unintended use								0
	Logging and Wood Harvesting
		Intentional use (small scale)								0
		Intentional use (small scale)								0
		Intentional (large-scale) use								0
		Unintentional use (small scale)								0
		Unintentional (large-scale) use								0
	Fishing & Harvesting Aquatic Resources
		Intentional use (small scale)								0
		Intentional (large-scale) use								0
		Unintentional use (small scale)								0
		Unintentional (large-scale) use								0
6. Human intrusions and disturbances
	Recreational activities									0
	War and civil unrest/Military exercises									0
	Work & other activities									0
	Work & other activities									0
	Work & other activities									0
	Work & other activities									0
	Work & other activities									0
7. Modifications of natural systems										0
	Fire and Fire Suppression
		Increased Fire frequency/ intensity	PDF /Fooma board (Kango)	03/06/2022	8.479067,-8.8676315	Wooded and tree-filled savannahs	Bushfire in a wooded savannah in progressive reconstruction along the Kango river devastated by the action of the intense bushfire	3	2	6	Establishment of Village Committees to Combat Bush Fires. Putting Out Early Fires in Time. Supporting and Strengthening the Capacity of Conservation Agents and Village Committees for Forest Management (COGEF ACCM). Broad Awareness Raising of the Local Population on the Harmful Effects of Fires
		Increased Fire frequency/ intensity	PDF Tourela	05/29/2022	8.4958344,-8.9693918	Dense forests	Intense bushfires in devastated dense forest with closed canopy	2	2	4	Timely Control of Early Fires. Support and Capacity Building of Conservators and Village Forest Management Committees (COGEF ACCM)
		Increased Fire frequency/ intensity	PDF /Fooma (Farafina)	03/06/2022	8.5072728,-8.8684907	Wooded and tree-filled savannahs	Bushfire in a wooded savannah in progressive reconstruction	2	2	4	Early Fires Putting on Time. Setting up Village Committees to Fight Bush Fires and Forest Fires.
		Increased Fire frequency/ intensity	PDF/Dandano (Boo)	2022-05-25	8.4231763,-8.931694	Gallery forests	Bushfires	2	2	4	Timing of Early Fires and Creation of Village Committees to Fight Bush Fires in Villages
		Suppression of fire frequency/intensity								0
	Dams and water management/use									0
	Other ecosystem changes	Abstraction of surface water								0
		Abstraction of ground water								0
		Small dams								0
		Large dams								0
8. Invasive or problematic species, genes, diseases										0
	Invasive Non-Native/Alien Species		PDF/Dandano (Beaou)		8.4391339,-8.9789009	Grassy savannas	Persistent bushfires each year cause the growth of these invasive spaces	3	2	6	Timely Control of Early Fires and Establishment of Village Committees to Combat Bush Fires in Riverside Villages. Capacity Building of Conservators to Keep Them in Position.
	Invasive Non-Native/Alien Species		PDF Fooma wizie		8.5062949,-8.8838999	Shrubby savannas	Invasive spaces (Chromolaena odorata) in a shrub savannah degraded by the action of bushfire	3	2	6	Early fires and establishment of Village Committees to combat bushfires and forest fires. Capacity building of conservators and Village Committees for forest management
	Invasive Non-Native/Alien Species		PDF/Dandano (Boo)		8.4251417,-8.9287429	Degraded, secondary and transitional forests	Degraded secondary forest, dominated by Chromolaena odorata and moukouna preinsis action caused by persistent bushfires (each year)	2	2	4	Early Fires and Establishment of Village Committees to Fight Bush Fires in the Village.
	Invasive Non-Native/Alien Species		PDF/Nawoinsou (Basayie)		8.4821136,-8.9720616	Degraded, secondary and transitional forests	Invasive areas in a secondary transition forest dominated by Chromolaena odorata and Trema orientalis (guineensis) due to bushfires	1	2	2	Fight against bushfires and timely suppression of early fires. Support and strengthening of conservators and COGEF/ACCM
	Problematic Native Species									0
9. Pollution										0
	Domestic and urban wastewater									0
	Industrial & Military Effluents
		Oil spills								0
		Mining seepage								0
	Agricultural & Forestry Effluents									0
	Garbage and solid waste									0
	Airbourne pollutants									0
		Acid rain, smog, ozone								0
10. Geological events
	Volcanoes									0
	Earthquakes									0
	Avalanches and landslides									0
11. Climate change and severe weather events
	Habitat shifting alteration									0
	Drought									0
	Temperature extremes									0
	Storms & Flooding									0
	Other									0
TOTAL SCORE										419

## Sheet:  Nimba
IUCN Threats to CEPF Project Risk Register			Last Review Date: June 2022	Last Review Date: June 2022			Threat level and description of activities						Weak	AVERAGE	Pupil	Very High
Protected Area: NIMBA MOUNTAINS			Area/Location	Date recorded	Contact details	Habitat	Description of activities	Risk scores (3 = high), 1 = low)	Calendar (Past = 2, Current = 3, Future = 1)	Overall impact level	Mitigation measures		1-3	4-6	7-9	10-12
Threat Class	Under Classification_1	Under Classification_2
1. Residential & Commercial													Total Score Overall Impact Level
	Habitat & Urban Areas									0
	Commercial and industrial areas									0
	Tourism & Recreational Spaces									0
2. Agriculture & Aquaculture
	Agriculture and non-woody perennial crops									0
		Shifting agriculture	Keoulenta	05/28/2022	7.7093273,-8.3348387	Discontinuous urban fabric and villages	Rice field	1	1	1	Awareness
		Smallholder farming	Seringbara Nimba side	02/06/2022	7.6389531,-8.456942	Degraded, secondary and transitional forests	Rice field near the reserve	1	1	1	Awareness and restoration
		Agro-industry farming	Seringbara Nimba side	02/06/2022	7.6410824,-8.4522973	Rainfed crops and fallow land	Coffee plantation	1	1	1
		Agro-industry farming	Seringbara Nimba side	02/06/2022	7.6409917,-8.451675	Degraded, secondary and transitional forests	Cocoa plantation	1	1	1
		Agro-industry farming	Seringbara Nimba side	02/06/2022	7.6399685,-8.4550963	Degraded, secondary and transitional forests	Coffee plantation	1	1	1
	Wood and pulp plantations									0
	Livestock breeding and raising									0
		Nomadic grazing	Seringbara Nimba side	02/06/2022	7.6628076,-8.4510783	Shrubby savannas	Pastures	2	1	2
		Smallholder Grazing, ranching or farming								0
		Agro-industry pasture, livestock or agriculture								0
	Marine and freshwater aquaculture									0
3. Energy production and mining
	Oil and gas drilling									0
	Mining and Quarrying									0
	Renewable energy									0
4. Transport and service corridors
	Roads and railroads		Ziguepo nimba side	05/31/2023	7.7016884,-8.4110288	Dense forests	Miners' Route	3	4	9	Restoration
	Roads and railroads		Ziguepo	2022-06-01	7.702973,-8.4110787	Dense forests	Miners' Route	2	2	9	Restoration of the part
	Utility & Service Lines									0
	Shipping lanes									0
	Flight paths									0
5. Use of biological resources
	Hunting & Collecting Terrestrial animals									0
		Intentional use	Seringbara Nimba side	03/06/2022	7.6556706,-8.4567687	Dense forests	Poaching (trap)	2	1	2
		Intentional use	Seringbara Nimba side	03/06/2022	7.655583,-8.4571146	Dense forests	Poaching (trap)	2	1	2
		Intentional use	Seringbara Nimba side	03/06/2022	7.6557594,-8.4560303	Dense forests	Poaching (trap)	1	1	1
		Intentional use	Seringbara Nimba side	03/06/2022	7.655955,-8.4561917	Dense forests	Poaching (trap)	1	1	1
		Unintended use								0
		Unintended use								0
	Gathering Terrestrial Plants
		Intentional use	Seringbara Nimba side	2022-06-02	7.6516062,-8.4462806	Lowlands	White Wine Harvest	2	3	6	Awareness
		Intentional use	Ziguepo nimba side	05/31/2022	7.6971476,-8.4133369	Clear forests	Bark sampling of (Fagara) Zanthoxylum	2	1	2	Public awareness
		Intentional use	Ziguepo nimba side	05/31/2022	7.6971065,-8.4133675	Clear forests	Bark sampling of Annickia polycarpa	2	1	2	Public awareness
		Intentional use	Foromota	05/29/2022	7.7083277,-8.3650036	Dense forests	Garcinia kola bark collection	1	1	1	Awareness
		Intentional use	Nimba/foromota	05/29/2022	7.7035727,-8.3663275	Dense forests	Bark sampling Annickia polycarpa	1	1	1	Awareness
		Intentional use	Nimba	05/30/2022	7.7142452,-8.3795017	Clear forests	Bark sampling (undetermined species)	1	1	1	Public awareness
		Intentional use	Seringbara nimba side	02/06/2022	7.6565405,-8.4392722	Dense forests	Bark sampling	1	1	1	Public awareness
		Intentional use	Seringbara nimba side	03/06/2022	7.6393584,-8.4585415	Dense forests	Bark extraction, the latex of which is used as fuel	1	1	1	Public awareness
		Intentional use	Seringbara Nimba side	03/06/2022	7.644944,-8.4569827	Dense forests	Bark sampling of Terminalia ivorensis	1	1	1	Public awareness
		Intentional use	Foromota	2022-05-29	7.7114088,-8.3659037	Clear forests	Bark sampling	1	1	1	Awareness
		Unintended use								0
	Logging and wood harvesting
		Intentional use (small scale)	Keoulenta	05/28/2022	7.7039768,-8.3374586	Transitional shrub formation	Sawing of Terminalia ivorensis	1	1	1	Awareness
		Intentional use (small scale)								0
		Intentional (large-scale) use								0
		Unintentional use (small scale)								0
		Unintentional (large-scale) use								0
	Fishing & Harvesting Aquatic Resources
		Intentional use (small scale)								0
		Intentional use (small scale)								0
		Intentional use (small scale)								0
		Intentional (large-scale) use								0
		Unintentional use (small scale)								0
		Unintentional (large-scale) use								0
6. Human intrusions and disturbances
	Recreational activities									0
	War and civil unrest/Military exercises									0
	Work & other activities		Keoulenta	05/28/2022	7.7022283,-8.34485	Dense forests	Poacher's trail	1	1	1	Awareness
	Work & other activities		Keoulenta	05/28/2022	7.7026217,-8.3401366	Clear forests	Terminal removal	1	1	1	Resume the boundary marking
	Work & other activities		Foromota/Nimba	05/29/2022	7.7173667,-8.3656173	Discontinuous urban fabric and villages	Poacher's trail	1	1	1	Awareness
	Work & other activities		Nimba/Foromota	05/29/2022	7.6978652,-8.3697293	Gallery forests	Poacher's Trace	1	1	1	Awareness
	Work & other activities		Nimba/foromota	05/29/2022	7.7168756,-8.3629273	Forest plantations and reforestation	Poacher's trail	1	1	1	Awareness
	Work & other activities		Nimba/Gouamo	05/30/2022	7.7172564,-8.3789077	Secondary forest	Poacher's trail	1	1	1	Awareness
	Work & other activities		Ziguepo nimba side	05/31/2022	7.6989901,-8.4138099	Clear forests	Poacher's trail	1	1	1	Public awareness
	Work & other activities		Ziguepo nimba side	05/31/2022	7.6975,-8.4135413	Dense forests	Crossroads of poachers' tracks	1	1	1	Public awareness
	Work & other activities		Gbakore	01/06/2022	7.7052734,-8.4034231	Clear forests	Poacher's trail	1	1	1	Public awareness
	Work & other activities		Gbakore	01/06/2022	7.7031455,-8.4066236	Clear forests	Poacher's trail	1	1	1	Public awareness
	Work & other activities		Ziguepo	01/06/2022	7.7029923,-8.4078726	Clear forests	Poacher's trail	1	1	1	Public awareness
	Work & other activities		Seringbara nimba side	02/06/2022	7.66081,-8.4506996	Shrubby savannas	Home of the cattlemen	1	1	1	Eviction
	Work & other activities		Seringbara nimba side	02/06/2022	7.659004,-8.4386813	Clear forests	Poacher's trail	2	1	2	Public awareness
	Work & other activities		Seringbara Nimba side	02/06/2022	7.6507539,-8.4471575	Clear forests	Crossroads of the poachers' trail	2	1	2	Public awareness
	Work & other activities		Seringbara Nimba side	03/06/2022	7.6560266,-8.4533432	Clear forests	Poachers' Trail	1	1	1	Public awareness
	Work & other activities		Seringbara Nimba side	03/06/2022	7.652675,-8.4579503	Dense forests	Poaching (c12 case)	1	1	1	Public awareness
	Work & other activities		Gbyé village on the Nimba side	04/06/2022	7.6645109,-8.3219155	Dense forests	Poacher's trail	1	1	1	Public awareness
	Work & other activities		Gbyé village on the Nimba side	04/06/2022	7.662414,-8.3313172	Clear forests	Poacher's trail	1	1	1	Public awareness
	Work & other activities		Gbyé village on the Nimba side	04/06/2022	7.658862,-8.3341974	Dense forests	Elaist cut in Délincis	1	1	1	Public awareness
	Work & other activities		Gbyé village on the Nimba side	04/06/2022	7.6571057,-8.3309915	Dense forests	Poacher's trail	1	1	1	Public awareness
	Work & other activities		Gbyé village on the Nimba side	05/06/2022	7.6698432,-8.3318976	Dense forests	Poacher's trail	1	1	1	Public awareness
	Work & other activities		Gbyé village on the Nimba side	05/06/2022	7.6676394,-8.3327208	Clear forests	Poacher's trail	1	1	1	Public awareness
	Work & other activities		Gbyé village on the Nimba side	05/06/2022	7.6653741,-8.3269961	Clear forests	Poacher's trail	1	1	1	Public awareness
	Work & other activities									0
7. Modifications of natural systems										0
	Fire and Fire Suppression
		Increased fire frequency/intensity								0
		Suppression of fire frequency/intensity								0
	Dams and water management/use									0
	Other ecosystem changes	Abstraction of surface water								0
		Abstraction of ground water								0
		Small dams								0
		Large dams								0
8. Invasive or problematic species, genes, diseases										0
	Invasive Non-Native/Alien Species		Ziguepo nimba side	05/31/2022	7.7014883 -8.4109879 622.9 4.82	Dense forests	The appearance of Chromolaena odorata	1	1	1
	Invasive Non-Native/Alien Species		Ziguepo	01/06/2022	7.7024731 -8.4105292 634.0 4.56	Dense forests	Chromolaena odorata	1	1	1
	Problematic Native Species
9. Pollution										0
	Domestic and urban wastewater									0
	Industrial & Military Effluents
		Oil spills								0
		Mining seepage								0
	Agricultural & Forestry Effluents									0
	Garbage and solid waste									0
	Airbourne pollutants									0
		Acid rain, smog, ozone								0
10. Geological events
	Volcanoes									0
	Earthquakes									0
	Avalanches and landslides									0
11. Climate change and severe weather events
	Habitat shifting alteration									0
	Drought									0
	Temperature extremes									0
	Storms & Flooding									0
	Other									0
TOTAL SCORE										76

## Sheet:  Ziama
IUCN Threats to CEPF Project Risk Register			Last Review Date: June 2022				Threat level and description of activities							Weak	AVERAGE	Pupil	Very High
Protected Area: MAB/ FC ZIAMA			Area/Location	Date recorded	Contact details	Habitat	Description of activities	Risk scores (3 = high), 1 = low)	Calendar (Past = 2, Current = 3, Future = 1)	Overall impact level	Mitigation measures			1-3	4-6	7-9	10-12
Threat Class	Under Classification_1	Under Classification_2
1. Residential & Commercial														Total Score Overall Impact Level
	Habitat & Urban Areas		Avilissou	05/28/2022	8.2404928,-9.1526724	Discontinuous urban fabric and villages	Village intrusion into the reserve	2	3	6	Compensate the occupied part in the village territory
	Commercial and industrial areas									0
	Tourism & Recreational Spaces									0
2. Agriculture & Aquaculture
	Agriculture and non-woody perennial crops									0
		Shifting agriculture	Yomai	01/06/2022	8.4075106,-9.3905674	Degraded, secondary and transitional forests	Oil palm plantation installation	2	3	6	Suspension of planting, community awareness raising and bringing perpetrators to court
		Smallholder farming	Avilissou	05/27/2022	8.2275906,-9.159235	Lowland crops	Okra cultivation in the river basin	3	3	9	Ban on the cultivation of market garden produce in lowlands, support for communities in AGR.
		Smallholder farming	Avilissou	05/27/2022	8.2274864,-9.1610137	Degraded, secondary and transitional forests	Pepper field on the edge of the river basin	3	3	9	Eviction of the authors and suspension of the low-income for two renewables
		Smallholder farming	Avilissou	05/29/2022	8.2181553,-9.1690764	Lowland crops	Overflow on hillside at the edge of the river floodplain on which peppers, eggplant are planted	3	3	9	Destruction of plants on the overflow, suspension of the lowland and eviction of the author
		Smallholder farming	Avilissou	05/28/2022	8.2387121,-9.1621621	Lowland crops	Overflow on hillside planted with peppers	2	3	6	Pulled out the pepper plants on the overflow.
		Smallholder farming	Massadou	03/06/2022	8.3621618,-9.4422682	Lowland crops	Rice cultivation in the lowlands	2	3	6	Community support for AGRs
		Smallholder farming	Waleno	04/06/2022	8.3723659,-9.4682907	Lowland crops	Rice cultivation in the lowlands with a living hut next door	2	3	6	Community support in AGR and regular patrol in the reserve, provision of the site with patrol rations for the guards
		Smallholder farming	Waleno	04/06/2022	8.3696347,-9.472038	Lowland crops	Gnébé cultivation in the lowlands	2	3	6	Support from local communities in AGR.
		Smallholder farming	Lazaou	2022-06-02	8.3120396,-9.2814903	Dense forests	Banana plantation with chilli and eggplant	2	3	6	Eviction of the other and destruction of banana and eggplant plants
		Agro-industry farming	Avilissou	05/27/2022	8.2337493,-9.1500791	Degraded, secondary and transitional forests	Coffee plantation	3	3	9	Ban on maintenance and re-upholstery, perpetrators brought to court.
		Agro-industry farming	Avilissou	05/28/2022	8.2383595,-9.1687116	Agroforestry systems (association of perennial crops and forest species)	Debarking of the reforested Terminalia superba trees under which the coffees are planted	3	3	9	Translation of the authors before the courts and forcing them to reforest the destroyed forest plantation
		Agro-industry farming	Avilissou	05/28/2022	8.2375414,-9.1695402	Degraded, secondary and transitional forests	Coffee plantation extensions with tree girdling	3	3	9	Destruction of young plants and bringing the perpetrators to court.
		Agro-industry farming	Avilissou	05/29/2022	8.2186345,-9.1748862	Agroforestry systems (association of perennial crops and forest species)	Old cocoa plantation maintained with tree surrounds	3	3	9	Maintenance and re-upholstery prohibited
		Agro-industry farming	Avilissou	05/29/2022	8.2205259,-9.1722767	Agroforestry systems (association of perennial crops and forest species)	Debarking trees in coffee plantation	3	3	9	Ban on maintenance, eviction of the author and suspension of planting
		Agro-industry farming	Avilissou	05/27/2022	8.2284112,-9.1603961	Agroforestry systems (association of perennial crops and forest species)	Coffee plantation with tree bark stripping	3	2	6	Ban on maintenance and re-upholstery and bringing the perpetrators to court.
	Wood and pulp plantations									0
	Livestock Farming & Ranching									0
		Nomadic grazing								0
		Smallholder Grazing, ranching or farming								0
		Agro-industry pasture, livestock or agriculture								0
	Marine and freshwater aquaculture									0
3. Energy production and mining
	Oil and gas drilling									0
	Mining and Quarrying		Zoboloma	2022-06-03	8.3933183,-9.3411605	Gallery forests	Extraction of sand from the bed of a watercourse	2	3	6	Ban on sand extraction in the reserve, regular patrol by guards in the reserve and support of the site in patrol ration for the guards
	Mining and Quarrying		Seredou	2022-05-26	8.3890629 -9.305783	Dense forests	Extraction of sand from the bed of a watercourse	2	3	6	Raising awareness in the community and bringing recalcitrants to court.
	Renewable energy									0
4. Transport and service corridors
	Roads and railways									0
	Public services and service lines									0
	Seaways									0
	Flight paths									0
5. Use of biological resources
	Hunting & Collecting Terrestrial animals									0
		Intentional use	Seredou	05/31/2022	8.3867223,-9.2754036	Dense forests	Hunting with cable traps	3	3	9	Destruction of traps and bringing perpetrators to court
		Intentional use	Massadou	03/06/2022	8.3607999,-9.4402714	Dense forests	Hunting with steel cable traps	2	3	6	Destruction of traps community awareness
		Intentional use	Seredou	05/31/2022	8.3855009,-9.2771031	Dense forests	Hunting the Gambian rat (Crisetomis gambianus) by destroying its burrow.	2	2	4	Community awareness and bringing perpetrators to court
		Intentional use	Seredou	05/31/2022	8.3862613,-9.2761131	Dense forests	12 Gauge Hunting	2	2	4	Ban on carrying weapons in the reserve, translation of the perpetrators before the courts
		Intentional use	Seredou	05/31/2022	8.3863634,-9.2758142	Dense forests	12 Gauge Hunting	2	2	4	Ban on carrying weapons in the reserve, translation of the perpetrators before the courts
		Intentional use	Lazaou	02/06/2022	8.3144139,-9.2827095	Dense forests	Cutting raffia trees to extract coconut worms	2	2	4	Community awareness
		Unintended use								0
	Gathering Terrestrial Plants
		Intentional use	Seredou	05/31/2022	8.3855083,-9.2766862	Dense forests	Harvesting oil palm bunches	3	3	9	Allow fruit to ripen well before harvesting
		Intentional use	Avilissou	05/28/2022	8.2394106,-9.157628	Agroforestry systems (association of perennial crops and forest species)	Milicia regia bark stripping for medicinal purposes	2	3	6	Educating users of plants for disease treatment on proper harvesting methods
		Intentional use	Lazaou	02/06/2022	8.3109946,-9.2830318	Gallery forests	Raffia wine harvest	3	2	6	Community awareness on sustainable methods of using natural resources
		Intentional use	Lazaou	02/06/2022	8.3109643,-9.2788966	Lowland crops	Harvesting raffia wine in a lowland under exploitation	2	3	6	Community awareness and support in AGR
		Intentional use	Massadou	03/06/2022	8.361492,-9.441502	Dense forests	Harvesting the bark of Massularia acuminata	2	2	4	Community awareness of sustainable harvesting methods
		Unintended use								0
	Logging and wood harvesting
		Intentional use (small scale)	Seredou	05/26/2022	8.3918893,-9.3098716	Dense forests	Search for firewood	2	3	6	Community awareness and use of wood harvested by the family (right of use)
		Intentional use (small scale)	Seredou	05/31/2022	8.3830998,-9.2785769	Dense forests	Cutting wood to bake bricks	2	3	6	Community awareness
		Intentional use (small scale)	Seredou	05/31/2022	8.3843752,-9.2787102	Dense forests	Firewood harvesting	2	3	6	Community awareness
		Intentional use (small scale)	Seredou	05/26/2022	8.386115,-9.302774	Dense forests	Sawing wood near the residence of the technical advisor of the Sérédou agricultural research center.	2	2	4	Informed the management of the Sérédou agricultural research center to no longer carry out sawing in the reserve
		Intentional use (small scale)	Yomai	01/06/2022	8.4022695,-9.4020721	Degraded, secondary and transitional forests	Cutting small pieces of wood for fencing	1	3	3	Community awareness
		Intentional (large-scale) use								0
		Unintentional use (small scale)								0
		Unintentional (large-scale) use								0
	Fishing & Harvesting Aquatic Resources
		Intentional (large-scale) use								0
		Unintentional use (small scale)								0
		Unintentional (large-scale) use								0
6. Human intrusions and disturbances
	Recreational activities									0
	War and civil unrest/Military exercises									0
	Work & other activities		Avilissou	05/29/2022	8.21776 -9.1705205 537.7 4.3	Degraded, secondary and transitional forests	Living cabin next to the shallows	2	3	6	Destruction of the hut
7. Modifications of natural systems										0
	Fire and Fire Suppression
		Increased Fire frequency/ intensity	Seredou	05/31/2022	8.3870467,-9.2751818	Dense forests	Trace of bushfire	3	2	6	Provided the site with a forest fire management budget
		Increased Fire frequency/ intensity	Avilissou	05/29/2022	8.221146,-9.1607444	Degraded, secondary and transitional forests	Fire next to the low ground for extensions on hillside	2	2	4	Eviction of the other and suspension of his slum for a period of two years, renewable
		Suppression of fire frequency/ intensity								0
	Dams and water management/use									0
	Other ecosystem changes	Abstraction of surface water								0
		Abstraction of ground water								0
		Small dams								0
		Large dams								0
8. Invasive or problematic species, genes, diseases										0
	Invasive alien/non-native species
	Problematic native species									0
9. Pollution										0
	Domestic and urban wastewater									0
	Industrial & Military Effluents
		Oil spills								0
		Mining seepage								0
	Agricultural & Forestry Effluents		Avilissou	05/29/2022	8.2251555,-9.1522124	Lowland crops	Spraying herbicides in the floodplain	3	3	9	Ban on the use of pesticides in the reserve, community awareness and bringing the perpetrators to court
	Agricultural & Forestry Effluents		Avilissou	05/28/2022	8.2380642,-9.1673545	Lowland crops	Pesticide use in okra fields	2	3	6	Banning the use of pesticides in the reserve, raising awareness among the community and bringing the perpetrators to court
	Agricultural & Forestry Effluents		Avilissou	05/29/2022	8.2201576,-9.1646623	Lowland crops	Use of pesticides in floodplain	3	2	6	Ban on the use of pesticides in the reserve, eviction of the perpetrators and suspension of the lowland
	Garbage and solid waste		Seredou	05/26/2022	8.3843318,-9.3040721	Dense forests	Hospital waste dumping	3	3	9	Awareness raising for medical care clinic owners.
	Garbage and solid waste		Seredou	05/26/2022	8.3857734,-9.3043201	Dense forests	Dumping of hospital waste in the reserve along National Road No. 2.	3	3	9	Raising awareness among clinic owners and bringing perpetrators to court.
	Garbage and solid waste		Avilissou	05/28/2022	8.2405621,-9.1532253	Agroforestry systems (association of perennial crops and forest species)	Solid waste dump	3	3	9	Ban on dumping garbage in the reserve, community awareness
	Garbage and solid waste		Seredou	05/26/2022	8.3847339,-9.3035282	Dense forests	Discharge of hospital waste (syringe, bottles, etc.)	3	2	6	Raising awareness among medical clinic owners, transferring perpetrators to court.
	Garbage and solid waste		Seredou	05/26/2022	8.3843471,-9.3036172	Dense forests	Hospital waste dumping	3	2	6	Awareness raising for medical care clinic owners.
	Garbage and solid waste		Seredou	05/26/2022	8.3849282,-9.3046332	Dense forests	Hospital waste dumped in the reserve along National Road No. 2	3	2	6	Raising awareness among medical clinic owners and bringing perpetrators to court.
	Airbourne pollutants									0
		Acid rain, smog, ozone								0
10. Geological events
	Volcanoes									0
	Earthquakes									0
	Avalanches and landslides									0
11. Climate change and severe weather events
	Habitat shifting alteration									0
	Drought									0
	Temperature extremes									0
	Storms & Flooding									0
	Other									0
TOTAL SCORE										301
