# Supplementary material for: Developing a threat risk register based on the IUCN threat hierarchy for five tropical Important Plant Areas in Guinea
Source: PeerJ. 2025 Jul 14;13:e19629. doi: 10.7717/peerj.19629 (PMC12269778; doi:10.7717/peerj.19629)
Supplement: Supplemental Information 2 [file peerj-13-19629-s002.xlsx]

## Sheet: Anglais
IUCN threats for CEPF Risk Register		Date of Assessment:			Level of Threat and description of activities
AREA	DIECKE FORET CLASSEE	2021-11-01	Zone	Habitat	Description of activities	Risk Scores (3= high), 1=low)	Timeframe (Past=2, Ongoing=3, Future=1)	Overall Impact level	Mitigation Measures
1. Residential & Commercial								0
	Housing & Urban areas							0
	Commercial & Industrial areas							0
	Tourism & Recreational areas							0
2. Agriculture & Aquaculture								0
	Agriculture & Perennial Non-Timber crops							0
		Shifting agriculture						0
		Small-holder farming						0
		Agro-industry farming						0
	Wood & Pulp Plantations							0
	Livestock Farming & Ranching							0
		Nomadic grazing						0
		Small-holder Grazing, ranching or farming						0
		Agro-industry grazing, ranching or farming						0
	Marine & freshwater aquaculture							0
3. Energy Production & Mining								0
	Oil & Gas drilling							0
	Mining & Quarrying							0
	Renewable Energy							0
4. Transportation & Service corridors								0
	Roads & Railroads							0
	Utility & Service Lines							0
	Shipping lanes							0
	Flight paths							0
5. Biological Resource Use								0
	Hunting & Collecting Terrestrial animals							0
		Intentional Use						0
		Unintentional Use						0
	Gathering Terrestrial Plants							0
		Intentional Use						0
		Intentional Use						0
		Unintentional Use						0
	Logging & Wood harvesting							0
		Intentional Use (Small scale)						0
		Intentional Use (Small scale)						0
		Intentional Use (large scale)						0
		Unintentional Use (small scale)						0
		Unintentional Use (large scale)						0
	Fishing & Harvesting Aquatic resources							0
		Intentional Use (Small scale)						0
		Intentional Use (large scale)						0
		Unintentional Use (small scale)						0
		Unintentional Use (large scale)						0
6. Human Intrusions & Disturbance								0
	Recreational Activities							0
	War & Civil unrest/ Military exercises							0
	Work & other activities							0
7. Natural Systems Modifications								0
	Fire & Fire Suppression							0
		Increased Fire frequency/ intensity						0
		Suppression of fire frequency/ intensity						0
	Dams & Water Management/Use							0
		Abstraction of surface water						0
		Abstraction of ground water						0
		Small Dams						0
		Large Dams						0
	Other Ecosystem Modifications							0
8. Invasive or problematic species, genes, diseases								0
	Invasive Non-Native/Alien Species							0
	Problematic Native Species							0
9. Pollution								0
	Domestic & Urban wase water							0
	Industrial & Military effluents							0
		Oil spills						0
		Seepage from Mining						0
	Agricultural & Forestry effluents							0
	Garbage & solid waste							0
	Airborne pollutants							0
		Acid rain, smog, ozone						0
10. Geological Events								0
	Cvolcanoes							0
	Earthquakes							0
	Avalanches & Landslides							0
11. Climate change & severe weather								0
	Habitat shifting alteration							0
	Drought							0
	Temperature extremes							0
	Storms & Flooding							0
	Other							0
TOTAL SCORE								0

## Sheet: Francais
Menaces de l'UICN pour le registre des risques du projet CEPF			Date d'evaluation: Novembre 2021			Niveau de menace et description des activites						Faible	Moyen	Elevé	Tres Elevé
Aire Protegee : DIECKE FORET CLASSEE		Date d'evaluation : Novembre 2021	Zone/ Localite	Coordonnees	Habitat	Description des activites	Scores de risque (3 = élevé), 1 = faible)	Calendrier (Passé = 2, En cours = 3, Futur = 1)	Niveau d'impact global	Mesures d'atténuation		1-3	4-6	7-9	10-12
Classe de menace	Sous Classification_1	Sous Classification_2
1. Résidence & commerciale												Score totale Niveau d'impact globale
	Habitat & Zones urbaines								0
	Zones commerciales et industrielles								0
	Tourisme & Espaces récréatifs								0
2. Agriculture & Aquaculture												0 to 120	121 to 360	360-500	500+
	Agriculture et cultures pérennes non ligneuses								0
		Agriculture itinérante							0
		petite exploitation agricole							0
		Agriculture agro-industrielle							0
	Plantations de bois et de pâte à papier								0
	Élevage et élevage de bétail								0
		Pâturage nomade							0
		Petit exploitant Pâturage, élevage en ranch ou agriculture							0
		Agro-industrie pâturage, élevage ou agriculture							0
	Aquaculture marine et d'eau douce								0
3. Production d'énergie et exploitation minière
	Forage pétrolier et gazier								0
	Mines et carrières								0
	Énergie renouvelable								0
4. Corridors de transport et de service
	Routes et chemins de fer								0
	Services publics et lignes de service								0
	Voies maritimes								0
	Trajectoires de vol								0
5. Utilisation des ressources biologiques
	Chasse & Collection Animaux terrestres								0
		Utilisation intentionnelle							0
		Utilisation non intentionnelle							0
	Recolte de plantes terrestres
		Utilisation intentionnelle							0			question: est ce que les palmiers sont commun, est-ils sont multitroncs?
		Utilisation non intentionnelle							0
	Exploitation forestière et récolte du bois
		Utilisation intentionnelle (petite échelle)							0			Cette espece est commun et envahissent, donc ce n'est pas une probleme. Possible de supprimer
		Utilisation intentionnelle (à grande échelle)							0
		Utilisation non intentionnelle (petite échelle)							0
		Utilisation non intentionnelle (à grande échelle)							0
	Pêche & Récolte Ressources aquatiques
		Intentional Use (Small scale)							0
		Intentional Use (large scale)							0
		Unintentional Use (small scale)							0
		Unintentional Use (large scale)							0
6. Intrusions et perturbations humaines
	Activités récréatives								0
	Guerre et troubles civils/ Exercices militaires								0
	Travail & autres activités								0
7. Modifications des systèmes naturels									0
	Incendie et suppression des incendies
		Augmentation de la fréquence/intensité des incendies							0
		Suppression de la fréquence/intensité des incendies							0
	Barrages et gestion/utilisation de l'eau								0
	Autres modifications de l'écosystème	Prélèvement d'eau de surface							0
		Prélèvement d'eau souterraine							0
		Petits barrages							0
		Grands barrages							0
8. Espèces envahissantes ou problématiques, gènes, maladies									0
	Espèces exotiques/non indigènes envahissantes
	Espèces indigènes problématiques								0
9. Pollution									0
	Eaux usées domestiques et urbaines								0
	Effluents Industriels & Militaires
		Les déversements de pétrole							0
		Suintement de l'exploitation minière							0
	Effluents Agricoles & Forestiers								0
	Ordures et déchets solides								0
	Polluants atmosphériques								0
		Pluies acides, smog, ozone							0
10. Événements géologiques
	Volcans								0
	Tremblements de terre								0
	Avalanches et glissements de terrain								0
11. Changement climatique et phénomènes météorologiques violents
	Altération de déplacement de l'habitat								0
	Sécheresse								0
	Températures extrêmes								0
	Tempêtes et inondations								0
	Autre								0
TOTAL SCORE									0
